# Supplementary material
Source: Springer Nature journal article supplement (https://www.springermedizin.de/resource/supplementary/12936_2011_2077_MOESM7_ESM.pdf/9543396)

A

*P. berghei*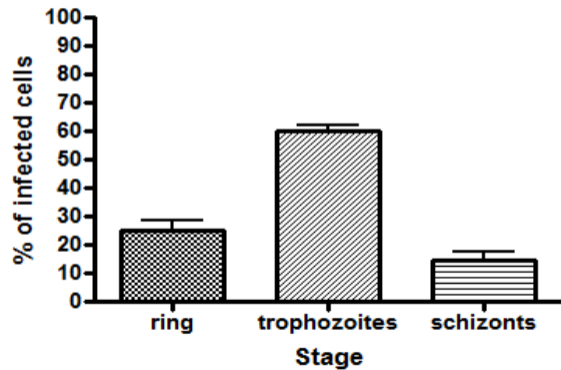

B

*P. yoelii*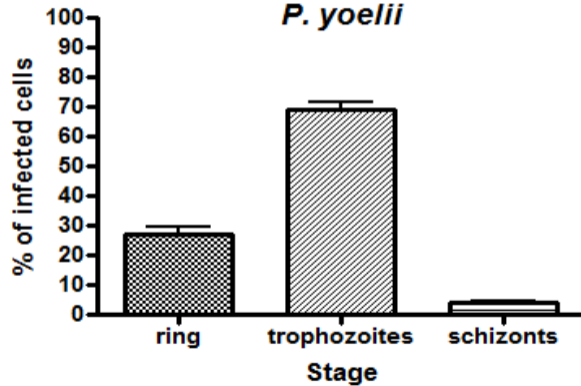

C

Parasitemia

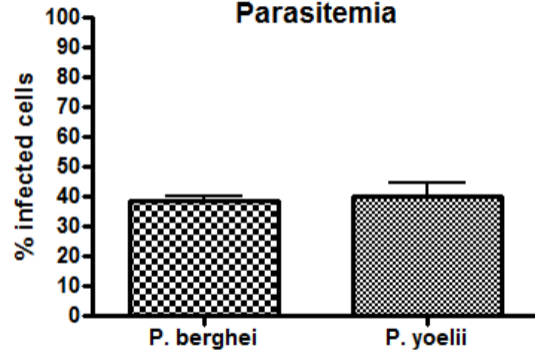

Supplement: MOESM7 [file 9543396]
